# Supplementary material
Source: publisher site journal article supplement (https://www.spandidos-publications.com/4548/downloadSupplementary)
Supplement: Supplementary file 1 [file downloadSupplementary]

## Sheet: Sheet1
Table SVII. KEGG and GO analyses in the BM and non-BM groups.
A, Signaling pathways enriched by KEGG analysis of all somatic mutated genes in BM group (n=26)									B, Signaling pathways enriched by KEGG analysis of all somatic mutated genes in Non-BM group (n=64)									C, Functional terms enriched by GO analysis of all somatic mutated genes in BM group (n=26)									D, Functional terms enriched by GO analysis of all somatic mutated genes in Non-BM group (n=64)
ID	Description	BgRatio	pvalue	p.adjust	qvalue	geneID	Count		ID	Description	BgRatio	pvalue	p.adjust	qvalue	geneID	Count		ID	Description	BgRatio	pvalue	p.adjust	qvalue	geneID	Count		ID	Description	BgRatio	pvalue	p.adjust	qvalue	geneID	Count
hsa05226	Gastric cancer	149/8142	1.85353e-12	1.85353e-12	7.21901e-11	TP53/TERT/KRAS/RB1/EGFR/SMAD4/CTNNB1/APC/NRAS	9		hsa05230	Central carbon metabolism in cancer	70/8142	1.46589e-20	1.46589e-20	9.10396e-19	PDGFRA/NRAS/TP53/PIK3CA/KRAS/EGFR/HRAS/MTOR/KIT/FGFR3/NTRK1/IDH1/ERBB2	13		GO:0090575	RNA polymerase II transcription regulator complex	161/19559	7.45211e-06	0.000916609	0.000502037	TP53/RB1/SMAD4/CTNNB1	4		GO:0016605	PML body	102/19559	1.49773e-05	0.00180455	0.000949765	TP53/RB1/MTOR/TERT	4
hsa05225	Hepatocellular carcinoma	168/8142	5.53252e-12	5.53252e-12	1.07738e-10	TP53/TERT/KRAS/RB1/EGFR/SMAD4/CTNNB1/APC/NRAS	9		hsa05219	Bladder cancer	41/8142	2.46915e-19	2.46915e-19	7.66737e-18	NRAS/TP53/RB1/KRAS/EGFR/HRAS/CDKN2A/FGFR3/SRC/BRAF/ERBB2	11		GO:0030877	beta-catenin destruction complex	12/19559	4.12108e-05	0.00168964	0.000925436	CTNNB1/APC	2		GO:0005925	focal adhesion	415/19559	2.76352e-05	0.00180455	0.000949765	KRAS/EGFR/JAK2/CTNNB1/FGFR3/SRC	6
hsa05210	Colorectal cancer	86/8142	1.21267e-10	1.21267e-10	1.57434e-09	TP53/KRAS/EGFR/SMAD4/CTNNB1/APC/NRAS	7		hsa01522	Endocrine resistance	98/8142	1.58123e-18	1.58123e-18	3.27343e-17	CYP2D6/NRAS/TP53/PIK3CA/RB1/KRAS/EGFR/HRAS/CDKN2A/MTOR/SRC/BRAF/ERBB2	13		GO:1990909	Wnt signalosome	12/19559	4.12108e-05	0.00168964	0.000925436	CTNNB1/APC	2		GO:0030055	cell-substrate junction	423/19559	3.07594e-05	0.00180455	0.000949765	KRAS/EGFR/JAK2/CTNNB1/FGFR3/SRC	6
hsa05213	Endometrial cancer	58/8142	7.59634e-10	7.59634e-10	7.39644e-09	TP53/KRAS/EGFR/CTNNB1/APC/NRAS	6		hsa01521	EGFR tyrosine kinase inhibitor resistance	79/8142	7.84391e-18	7.84391e-18	1.21787e-16	PDGFRA/NRAS/PIK3CA/KRAS/EGFR/HRAS/JAK2/MTOR/FGFR3/SRC/BRAF/ERBB2	12		GO:0016605	PML body	102/19559	7.33985e-05	0.002257	0.00123618	TP53/TERT/RB1	3		GO:0009925	basal plasma membrane	51/19559	5.81765e-05	0.00210857	0.00110977	ERBB4/EGFR/ERBB2	3
hsa05223	Non-small cell lung cancer	72/8142	2.8891e-09	2.8891e-09	2.25045e-08	TP53/KRAS/RB1/EGFR/ALK/NRAS	6		hsa05215	Prostate cancer	97/8142	1.05647e-16	1.05647e-16	1.31225e-15	PDGFRA/NRAS/TP53/PIK3CA/RB1/KRAS/EGFR/HRAS/CTNNB1/MTOR/BRAF/ERBB2	12		GO:0016342	catenin complex	31/19559	0.000287729	0.00597635	0.00327331	CTNNB1/APC	2		GO:0019898	extrinsic component of membrane	306/19559	7.91477e-05	0.00210857	0.00110977	PIK3CA/KRAS/CTNNB1/APC/SRC	5
hsa05224	Breast cancer	147/8142	5.41252e-09	5.41252e-09	3.51339e-08	TP53/KRAS/RB1/EGFR/CTNNB1/APC/NRAS	7		hsa05214	Glioma	75/8142	3.58521e-16	3.58521e-16	3.33733e-15	PDGFRA/NRAS/TP53/PIK3CA/RB1/KRAS/EGFR/HRAS/CDKN2A/MTOR/BRAF	11		GO:0005667	transcription regulator complex	413/19559	0.000291529	0.00597635	0.00327331	TP53/RB1/SMAD4/CTNNB1	4		GO:0045121	membrane raft	329/19559	0.000111314	0.00210857	0.00110977	KRAS/EGFR/JAK2/CTNNB1/SRC	5
hsa05219	Bladder cancer	41/8142	1.05538e-08	1.05538e-08	5.87204e-08	TP53/KRAS/RB1/EGFR/NRAS	5		hsa05224	Breast cancer	147/8142	3.76157e-16	3.76157e-16	3.33733e-15	NRAS/TP53/PIK3CA/RB1/KRAS/EGFR/HRAS/CTNNB1/APC/MTOR/KIT/BRAF/ERBB2	13		GO:0019897	extrinsic component of plasma membrane	172/19559	0.000344004	0.00604465	0.00331072	KRAS/CTNNB1/APC	3		GO:0098857	membrane microdomain	330/19559	0.00011291	0.00210857	0.00110977	KRAS/EGFR/JAK2/CTNNB1/SRC	5
hsa05215	Prostate cancer	97/8142	1.77944e-08	1.77944e-08	8.19402e-08	TP53/KRAS/RB1/EGFR/CTNNB1/NRAS	6		hsa05226	Gastric cancer	149/8142	4.50229e-16	4.50229e-16	3.4952e-15	NRAS/TP53/PIK3CA/RB1/KRAS/EGFR/HRAS/CTNNB1/APC/MTOR/BRAF/TERT/ERBB2	13		GO:0061695	transferase complex, transferring phosphorus-containing groups	253/19559	0.00105735	0.0162567	0.00890396	TP53/TERT/RB1	3		GO:0019897	extrinsic component of plasma membrane	172/19559	0.000115514	0.00210857	0.00110977	KRAS/CTNNB1/APC/SRC	4
hsa01522	Endocrine resistance	98/8142	1.89348e-08	1.89348e-08	8.19402e-08	TP53/KRAS/RB1/EGFR/CYP2D6/NRAS	6		hsa05213	Endometrial cancer	58/8142	1.77135e-15	1.77135e-15	1.22234e-14	NRAS/TP53/PIK3CA/KRAS/EGFR/HRAS/CTNNB1/APC/BRAF/ERBB2	10		GO:0016328	lateral plasma membrane	65/19559	0.00126634	0.0173067	0.00947907	CTNNB1/APC	2		GO:0098589	membrane region	343/19559	0.000135311	0.00210857	0.00110977	KRAS/EGFR/JAK2/CTNNB1/SRC	5
hsa05165	Human papillomavirus infection	331/8142	6.63946e-08	6.63946e-08	2.5859e-07	TP53/TERT/KRAS/RB1/EGFR/CTNNB1/APC/NRAS	8		hsa05225	Hepatocellular carcinoma	168/8142	2.20707e-15	2.20707e-15	1.37071e-14	NRAS/TP53/PIK3CA/RB1/KRAS/EGFR/HRAS/CDKN2A/CTNNB1/APC/MTOR/BRAF/TERT	13		GO:0019898	extrinsic component of membrane	306/19559	0.00182565	0.0224555	0.0122991	KRAS/CTNNB1/APC	3		GO:0030877	beta-catenin destruction complex	12/19559	0.000138813	0.00210857	0.00110977	CTNNB1/APC	2
hsa05218	Melanoma	72/8142	1.90252e-07	1.90252e-07	6.73621e-07	TP53/KRAS/RB1/EGFR/NRAS	5		hsa05218	Melanoma	72/8142	1.76942e-14	1.76942e-14	9.15751e-14	PDGFRA/NRAS/TP53/PIK3CA/RB1/KRAS/EGFR/HRAS/CDKN2A/BRAF	10		GO:0045121	membrane raft	329/19559	0.00224465	0.0232071	0.0127108	KRAS/EGFR/CTNNB1	3		GO:1990909	Wnt signalosome	12/19559	0.000138813	0.00210857	0.00110977	CTNNB1/APC	2
hsa05214	Glioma	75/8142	2.33891e-07	2.33891e-07	6.95709e-07	TP53/KRAS/RB1/EGFR/NRAS	5		hsa05223	Non-small cell lung cancer	72/8142	1.76942e-14	1.76942e-14	9.15751e-14	NRAS/TP53/PIK3CA/RB1/KRAS/EGFR/HRAS/CDKN2A/BRAF/ERBB2	10		GO:0098857	membrane microdomain	330/19559	0.00226411	0.0232071	0.0127108	KRAS/EGFR/CTNNB1	3		GO:0045178	basal part of cell	69/19559	0.000143766	0.00210857	0.00110977	ERBB4/EGFR/ERBB2	3
hsa05212	Pancreatic cancer	76/8142	2.50079e-07	2.50079e-07	6.95709e-07	TP53/KRAS/RB1/EGFR/SMAD4	5		hsa04012	ErbB signaling pathway	85/8142	1.00572e-13	1.00572e-13	4.80463e-13	NRAS/ERBB4/PIK3CA/KRAS/EGFR/HRAS/MTOR/SRC/BRAF/ERBB2	10		GO:0098589	membrane region	343/19559	0.00252678	0.0239072	0.0130942	KRAS/EGFR/CTNNB1	3		GO:0098978	glutamatergic synapse	361/19559	0.000171791	0.00232579	0.0012241	ERBB4/HRAS/JAK2/MTOR/SRC	5
hsa05220	Chronic myeloid leukemia	76/8142	2.50079e-07	2.50079e-07	6.95709e-07	TP53/KRAS/RB1/SMAD4/NRAS	5		hsa05210	Colorectal cancer	86/8142	1.13574e-13	1.13574e-13	5.03825e-13	NRAS/TP53/PIK3CA/KRAS/EGFR/HRAS/CTNNB1/APC/MTOR/BRAF	10		GO:0030880	RNA polymerase complex	108/19559	0.00344642	0.0302792	0.0165843	TP53/TERT	2		GO:0005901	caveola	82/19559	0.000239878	0.00301561	0.00158717	JAK2/CTNNB1/SRC	3
hsa05160	Hepatitis C	157/8142	3.18992e-07	3.18992e-07	8.28259e-07	TP53/KRAS/RB1/EGFR/CTNNB1/NRAS	6		hsa05205	Proteoglycans in cancer	205/8142	1.00585e-12	1.00585e-12	4.16455e-12	NRAS/TP53/ERBB4/PIK3CA/KRAS/EGFR/HRAS/CTNNB1/MTOR/SRC/BRAF/ERBB2	12		GO:0005925	focal adhesion	415/19559	0.00432375	0.0330001	0.0180745	KRAS/EGFR/CTNNB1	3		GO:0099091	postsynaptic specialization, intracellular component	21/19559	0.000438038	0.00498183	0.00262202	CTNNB1/SRC	2
hsa05216	Thyroid cancer	37/8142	6.31811e-07	6.31811e-07	1.53796e-06	TP53/KRAS/CTNNB1/NRAS	4		hsa04151	PI3K-Akt signaling pathway	354/8142	1.54482e-12	1.54482e-12	5.99634e-12	PDGFRA/NRAS/TP53/ERBB4/PIK3CA/KRAS/EGFR/HRAS/JAK2/MTOR/KIT/FGFR3/NTRK1/ERBB2	14		GO:0005923	bicellular tight junction	122/19559	0.00437331	0.0330001	0.0180745	CTNNB1/APC	2		GO:0016323	basolateral plasma membrane	246/19559	0.000452894	0.00498183	0.00262202	ERBB4/EGFR/CTNNB1/ERBB2	4
hsa05166	Human T-cell leukemia virus 1 infection	222/8142	2.44721e-06	2.44721e-06	5.60661e-06	TP53/TERT/KRAS/RB1/SMAD4/NRAS	6		hsa05212	Pancreatic cancer	76/8142	1.98004e-12	1.98004e-12	7.23358e-12	TP53/PIK3CA/RB1/KRAS/EGFR/CDKN2A/MTOR/BRAF/ERBB2	9		GO:0030055	cell-substrate junction	423/19559	0.004561	0.0330001	0.0180745	KRAS/EGFR/CTNNB1	3		GO:0061695	transferase complex, transferring phosphorus-containing groups	253/19559	0.000503413	0.00521181	0.00274306	TP53/PIK3CA/RB1/TERT	4
hsa05163	Human cytomegalovirus infection	225/8142	2.64635e-06	2.64635e-06	5.72602e-06	TP53/KRAS/RB1/EGFR/CTNNB1/NRAS	6		hsa05163	Human cytomegalovirus infection	225/8142	3.05096e-12	3.05096e-12	1.05267e-11	PDGFRA/NRAS/TP53/PIK3CA/RB1/KRAS/EGFR/HRAS/CDKN2A/CTNNB1/MTOR/SRC	12		GO:0070160	tight junction	129/19559	0.00487548	0.0333158	0.0182474	CTNNB1/APC	2		GO:0044853	plasma membrane raft	113/19559	0.000614928	0.00601263	0.00316454	JAK2/CTNNB1/SRC	3
hsa04068	FoxO signaling pathway	131/8142	3.78457e-06	3.78457e-06	7.75785e-06	SOD2/KRAS/EGFR/SMAD4/NRAS	5		hsa05206	MicroRNAs in cancer	310/8142	6.16899e-12	6.16899e-12	2.01646e-11	PDGFRA/NRAS/TP53/PIK3CA/KRAS/EGFR/HRAS/CDKN2A/ATM/APC/MTOR/FGFR3/ERBB2	13		GO:0043296	apical junction complex	143/19559	0.00595592	0.0382795	0.0209661	CTNNB1/APC	2		GO:0000784	nuclear chromosome, telomeric region	124/19559	0.000805639	0.00746276	0.00392777	ATM/XRCC1/TERT	3
hsa04550	Signaling pathways regulating pluripotency of stem cells	143/8142	5.82444e-06	5.82444e-06	1.13423e-05	KRAS/SMAD4/CTNNB1/APC/NRAS	5		hsa05216	Thyroid cancer	37/8142	2.42634e-11	2.42634e-11	7.53444e-11	NRAS/TP53/KRAS/HRAS/CTNNB1/BRAF/NTRK1	7		GO:0005759	mitochondrial matrix	473/19559	0.0062243	0.0382795	0.0209661	TP53/SOD2/TERT	3		GO:0016342	catenin complex	31/19559	0.000961066	0.00845738	0.00445125	CTNNB1/APC	2
hsa05230	Central carbon metabolism in cancer	70/8142	8.43543e-06	8.43543e-06	1.56446e-05	TP53/KRAS/EGFR/NRAS	4		hsa04015	Rap1 signaling pathway	210/8142	3.78512e-11	3.78512e-11	1.11941e-10	PDGFRA/NRAS/PIK3CA/KRAS/EGFR/HRAS/CTNNB1/KIT/FGFR3/SRC/BRAF	11		GO:0070820	tertiary granule	164/19559	0.00776277	0.0435965	0.0238783	CDA/NRAS	2		GO:1990391	DNA repair complex	40/19559	0.00159884	0.0126855	0.0066766	ATM/XRCC1	2
hsa05161	Hepatitis B	162/8142	1.07246e-05	1.07246e-05	1.89862e-05	TP53/KRAS/RB1/SMAD4/NRAS	5		hsa04010	MAPK signaling pathway	294/8142	7.13404e-11	7.13404e-11	2.01392e-10	PDGFRA/NRAS/TP53/ERBB4/KRAS/EGFR/HRAS/KIT/FGFR3/BRAF/NTRK1/ERBB2	12		GO:0005912	adherens junction	166/19559	0.00794629	0.0435965	0.0238783	CTNNB1/APC	2		GO:0098687	chromosomal region	350/19559	0.0016808	0.0126855	0.0066766	ATM/APC/XRCC1/TERT	4
hsa04211	Longevity regulating pathway	89/8142	2.19628e-05	2.19628e-05	3.56414e-05	TP53/SOD2/KRAS/NRAS	4		hsa05220	Chronic myeloid leukemia	76/8142	1.05758e-10	1.05758e-10	2.8557e-10	NRAS/TP53/PIK3CA/RB1/KRAS/HRAS/CDKN2A/BRAF	8		GO:0005916	fascia adherens	10/19559	0.0081522	0.0435965	0.0238783	CTNNB1	1		GO:0090575	RNA polymerase II transcription regulator complex	161/19559	0.00170933	0.0126855	0.0066766	TP53/RB1/CTNNB1	3
hsa05235	PD-L1 expression and PD-1 checkpoint pathway in cancer	89/8142	2.19628e-05	2.19628e-05	3.56414e-05	KRAS/EGFR/ALK/NRAS	4		hsa05165	Human papillomavirus infection	331/8142	2.83224e-10	2.83224e-10	7.32905e-10	NRAS/TP53/PIK3CA/RB1/KRAS/EGFR/HRAS/CTNNB1/ATM/APC/MTOR/TERT	12		GO:1990907	beta-catenin-TCF complex	11/19559	0.00896398	0.0459404	0.0251621	CTNNB1	1		GO:0000781	chromosome, telomeric region	164/19559	0.00180192	0.0126855	0.0066766	ATM/XRCC1/TERT	3
hsa05167	Kaposi sarcoma-associated herpesvirus infection	194/8142	2.57308e-05	2.57308e-05	4.00858e-05	TP53/KRAS/RB1/CTNNB1/NRAS	5		hsa05167	Kaposi sarcoma-associated herpesvirus infection	194/8142	4.22995e-10	4.22995e-10	1.05081e-09	NRAS/TP53/PIK3CA/RB1/KRAS/HRAS/JAK2/CTNNB1/MTOR/SRC	10		GO:0019908	nuclear cyclin-dependent protein kinase holoenzyme complex	12/19559	0.00977514	0.0465014	0.0254693	RB1	1		GO:0009898	cytoplasmic side of plasma membrane	164/19559	0.00180192	0.0126855	0.0066766	KRAS/KIT/SRC	3
hsa05205	Proteoglycans in cancer	205/8142	3.35716e-05	3.35716e-05	5.02895e-05	TP53/KRAS/EGFR/CTNNB1/NRAS	5		hsa04810	Regulation of actin cytoskeleton	218/8142	1.3272e-09	1.3272e-09	3.17023e-09	PDGFRA/NRAS/PIK3CA/KRAS/EGFR/HRAS/APC/FGFR3/SRC/BRAF	10		GO:0000782	telomere cap complex	13/19559	0.0105857	0.0465014	0.0254693	TERT	1		GO:0098562	cytoplasmic side of membrane	188/19559	0.00265677	0.0179843	0.00946541	KRAS/KIT/SRC	3
hsa04919	Thyroid hormone signaling pathway	121/8142	7.35705e-05	7.35705e-05	0.000106125	TP53/KRAS/CTNNB1/NRAS	4		hsa04218	Cellular senescence	156/8142	1.39763e-09	1.39763e-09	3.21481e-09	NRAS/TP53/PIK3CA/RB1/KRAS/HRAS/CDKN2A/ATM/MTOR	9		GO:0000783	nuclear telomere cap complex	13/19559	0.0105857	0.0465014	0.0254693	TERT	1		GO:0030027	lamellipodium	201/19559	0.00320862	0.0206288	0.0108573	PIK3CA/CTNNB1/APC	3
hsa04934	Cushing syndrome	155/8142	0.000192374	0.000192374	0.000264844	RB1/EGFR/CTNNB1/APC	4		hsa05160	Hepatitis C	157/8142	1.47946e-09	1.47946e-09	3.2815e-09	NRAS/TP53/PIK3CA/RB1/KRAS/EGFR/HRAS/CTNNB1/BRAF	9		GO:0140445	chromosome, telomeric repeat region	13/19559	0.0105857	0.0465014	0.0254693	TERT	1		GO:0031252	cell leading edge	421/19559	0.00328185	0.0206288	0.0108573	PIK3CA/CTNNB1/APC/SRC	4
hsa04218	Cellular senescence	156/8142	0.000197201	0.000197201	0.000264844	TP53/KRAS/RB1/NRAS	4		hsa05221	Acute myeloid leukemia	67/8142	1.91466e-09	1.91466e-09	4.04765e-09	NRAS/PIK3CA/KRAS/HRAS/MTOR/KIT/BRAF	7		GO:0030027	lamellipodium	201/19559	0.0114702	0.0484259	0.0265234	CTNNB1/APC	2		GO:0016328	lateral plasma membrane	65/19559	0.00416692	0.0252889	0.0133099	CTNNB1/APC	2
hsa04213	Longevity regulating pathway - multiple species	62/8142	0.000219431	0.000219431	0.000284876	SOD2/KRAS/NRAS	3		hsa05161	Hepatitis B	162/8142	1.95522e-09	1.95522e-09	4.04765e-09	NRAS/TP53/PIK3CA/RB1/KRAS/HRAS/JAK2/SRC/BRAF	9		GO:0032993	protein-DNA complex	205/19559	0.0119098	0.0484259	0.0265234	TERT/CTNNB1	2		GO:0005911	cell-cell junction	493/19559	0.0057457	0.0337081	0.0177411	OBSCN/CTNNB1/APC/KIT	4
hsa05217	Basal cell carcinoma	63/8142	0.000230126	0.000230126	0.000289123	TP53/CTNNB1/APC	3		hsa04919	Thyroid hormone signaling pathway	121/8142	4.56989e-09	4.56989e-09	9.15529e-09	NRAS/TP53/PIK3CA/KRAS/HRAS/CTNNB1/MTOR/SRC	8		GO:0098831	presynaptic active zone cytoplasmic component	15/19559	0.0122049	0.0484259	0.0265234	CTNNB1	1		GO:0005770	late endosome	278/19559	0.00789836	0.0448423	0.0236012	EGFR/SRC/NTRK1	3
hsa05206	MicroRNAs in cancer	310/8142	0.000239295	0.000239295	0.000291247	TP53/KRAS/EGFR/APC/NRAS	5		hsa05235	PD-L1 expression and PD-1 checkpoint pathway in cancer	89/8142	1.443e-08	1.443e-08	2.80056e-08	NRAS/PIK3CA/KRAS/EGFR/HRAS/JAK2/MTOR	7											GO:0005902	microvillus	93/19559	0.00835338	0.0459436	0.0241808	PDGFRA/CTNNB1	2
hsa04310	Wnt signaling pathway	167/8142	0.000256277	0.000256277	0.000302464	TP53/SMAD4/CTNNB1/APC	4		hsa04550	Signaling pathways regulating pluripotency of stem cells	143/8142	1.71897e-08	1.71897e-08	3.23506e-08	NRAS/PIK3CA/KRAS/HRAS/JAK2/CTNNB1/APC/FGFR3	8											GO:0032587	ruffle membrane	95/19559	0.0087026	0.0464139	0.0244283	APC/SRC	2
hsa05211	Renal cell carcinoma	69/8142	0.000301447	0.000301447	0.00034531	KRAS/VHL/NRAS	3		hsa05207	Chemical carcinogenesis - receptor activation	212/8142	2.08752e-08	2.08752e-08	3.81311e-08	NRAS/PIK3CA/RB1/KRAS/EGFR/HRAS/JAK2/MTOR/SRC	9											GO:0031234	extrinsic component of cytoplasmic side of plasma membrane	99/19559	0.00942044	0.0487646	0.0256656	KRAS/SRC	2
hsa04520	Adherens junction	71/8142	0.000328051	0.000328051	0.000365049	EGFR/SMAD4/CTNNB1	3		hsa04072	Phospholipase D signaling pathway	148/8142	2.25343e-08	2.25343e-08	3.99856e-08	PDGFRA/NRAS/PIK3CA/KRAS/EGFR/HRAS/MTOR/KIT	8
hsa04137	Mitophagy - animal	72/8142	0.000341903	0.000341903	0.000369895	TP53/KRAS/NRAS	3		hsa05231	Choline metabolism in cancer	98/8142	2.83856e-08	2.83856e-08	4.89693e-08	PDGFRA/NRAS/PIK3CA/KRAS/EGFR/HRAS/MTOR	7
hsa01521	EGFR tyrosine kinase inhibitor resistance	79/8142	0.00044955	0.00044955	0.000473211	KRAS/EGFR/NRAS	3		hsa05166	Human T-cell leukemia virus 1 infection	222/8142	3.11804e-08	3.11804e-08	5.2337e-08	NRAS/TP53/PIK3CA/RB1/KRAS/HRAS/CDKN2A/ATM/TERT	9
hsa00983	Drug metabolism - other enzymes	80/8142	0.000466505	0.000466505	0.000478135	DPYD/CDA/TPMT	3		hsa04014	Ras signaling pathway	232/8142	4.56971e-08	4.56971e-08	7.4685e-08	PDGFRA/NRAS/PIK3CA/KRAS/EGFR/HRAS/KIT/FGFR3/NTRK1	9
hsa05203	Viral carcinogenesis	204/8142	0.00054965	0.00054965	0.000542791	TP53/KRAS/RB1/NRAS	4		hsa04917	Prolactin signaling pathway	70/8142	1.05397e-07	1.05397e-07	1.67839e-07	NRAS/PIK3CA/KRAS/HRAS/JAK2/SRC	6
hsa04012	ErbB signaling pathway	85/8142	0.000557461	0.000557461	0.000542791	KRAS/EGFR/NRAS	3		hsa04722	Neurotrophin signaling pathway	119/8142	1.09568e-07	1.09568e-07	1.70119e-07	NRAS/TP53/PIK3CA/KRAS/HRAS/BRAF/NTRK1	7
hsa04015	Rap1 signaling pathway	210/8142	0.000613344	0.000613344	0.000572274	KRAS/EGFR/CTNNB1/NRAS	4		hsa04068	FoxO signaling pathway	131/8142	2.12395e-07	2.12395e-07	3.21728e-07	NRAS/PIK3CA/KRAS/EGFR/HRAS/ATM/BRAF	7
hsa04540	Gap junction	88/8142	0.000617127	0.000617127	0.000572274	KRAS/EGFR/NRAS	3		hsa04510	Focal adhesion	201/8142	2.44108e-07	2.44108e-07	3.60962e-07	PDGFRA/PIK3CA/EGFR/HRAS/CTNNB1/SRC/BRAF/ERBB2	8
hsa05207	Chemical carcinogenesis - receptor activation	212/8142	0.000635701	0.000635701	0.000575788	KRAS/RB1/EGFR/NRAS	4		hsa05203	Viral carcinogenesis	204/8142	2.73572e-07	2.73572e-07	3.876e-07	NRAS/TP53/PIK3CA/RB1/KRAS/HRAS/CDKN2A/SRC	8
hsa05417	Lipid and atherosclerosis	215/8142	0.00067032	0.00067032	0.000593346	TP53/SOD2/KRAS/NRAS	4		hsa04210	Apoptosis	136/8142	2.74605e-07	2.74605e-07	3.876e-07	NRAS/TP53/PIK3CA/KRAS/HRAS/ATM/NTRK1	7
hsa04810	Regulation of actin cytoskeleton	218/8142	0.000706266	0.000706266	0.000611271	KRAS/EGFR/APC/NRAS	4		hsa04540	Gap junction	88/8142	4.17735e-07	4.17735e-07	5.76523e-07	PDGFRA/NRAS/KRAS/EGFR/HRAS/SRC	6
hsa04912	GnRH signaling pathway	93/8142	0.000725404	0.000725404	0.000614187	KRAS/EGFR/NRAS	3		hsa04211	Longevity regulating pathway	89/8142	4.46889e-07	4.46889e-07	6.03352e-07	NRAS/TP53/PIK3CA/KRAS/HRAS/MTOR	6
hsa05208	Chemical carcinogenesis - reactive oxygen species	223/8142	0.000769204	0.000769204	0.000637414	SOD2/KRAS/EGFR/NRAS	4		hsa04370	VEGF signaling pathway	59/8142	1.45442e-06	1.45442e-06	1.92185e-06	NRAS/PIK3CA/KRAS/HRAS/SRC	5
hsa05231	Choline metabolism in cancer	98/8142	0.000845143	0.000845143	0.000685752	KRAS/EGFR/NRAS	3		hsa04213	Longevity regulating pathway - multiple species	62/8142	1.86662e-06	1.86662e-06	2.41515e-06	NRAS/PIK3CA/KRAS/HRAS/MTOR	5
hsa04933	AGE-RAGE signaling pathway in diabetic complications	100/8142	0.000896354	0.000896354	0.000712462	KRAS/SMAD4/NRAS	3		hsa04935	Growth hormone synthesis, secretion and action	119/8142	2.48819e-06	2.48819e-06	3.15367e-06	NRAS/PIK3CA/KRAS/HRAS/JAK2/MTOR	6
hsa04916	Melanogenesis	101/8142	0.000922685	0.000922685	0.000718723	KRAS/CTNNB1/NRAS	3		hsa04062	Chemokine signaling pathway	192/8142	2.82835e-06	2.82835e-06	3.51311e-06	NRAS/PIK3CA/KRAS/HRAS/JAK2/SRC/BRAF	7
hsa04726	Serotonergic synapse	115/8142	0.00134424	0.00134424	0.00102656	KRAS/CYP2D6/NRAS	3		hsa05211	Renal cell carcinoma	69/8142	3.18867e-06	3.18867e-06	3.883e-06	NRAS/PIK3CA/KRAS/HRAS/BRAF	5
hsa04071	Sphingolipid signaling pathway	119/8142	0.00148363	0.00148363	0.00109025	TP53/KRAS/NRAS	3		hsa04137	Mitophagy - animal	72/8142	3.94172e-06	3.94172e-06	4.66897e-06	NRAS/TP53/KRAS/HRAS/SRC	5
hsa04722	Neurotrophin signaling pathway	119/8142	0.00148363	0.00148363	0.00109025	TP53/KRAS/NRAS	3		hsa04926	Relaxin signaling pathway	129/8142	3.98445e-06	3.98445e-06	4.66897e-06	NRAS/PIK3CA/KRAS/EGFR/HRAS/SRC	6
hsa04110	Cell cycle	126/8142	0.00174889	0.00174889	0.00126138	TP53/RB1/SMAD4	3		hsa01524	Platinum drug resistance	73/8142	4.22156e-06	4.22156e-06	4.85521e-06	TP53/PIK3CA/CDKN2A/ATM/ERBB2	5
hsa04926	Relaxin signaling pathway	129/8142	0.00187111	0.00187111	0.00132499	KRAS/EGFR/NRAS	3		hsa04910	Insulin signaling pathway	137/8142	5.65022e-06	5.65022e-06	6.38016e-06	NRAS/PIK3CA/KRAS/HRAS/MTOR/BRAF	6
hsa04010	MAPK signaling pathway	294/8142	0.00214879	0.00214879	0.00148739	TP53/KRAS/EGFR/NRAS	4		hsa04915	Estrogen signaling pathway	138/8142	5.89326e-06	5.89326e-06	6.5318e-06	NRAS/PIK3CA/KRAS/EGFR/HRAS/SRC	6
hsa04210	Apoptosis	136/8142	0.00217681	0.00217681	0.00148739	TP53/KRAS/NRAS	3		hsa05417	Lipid and atherosclerosis	215/8142	5.99486e-06	5.99486e-06	6.5318e-06	NRAS/TP53/PIK3CA/KRAS/HRAS/JAK2/SRC	7
hsa04915	Estrogen signaling pathway	138/8142	0.00226955	0.00226955	0.00152401	KRAS/EGFR/NRAS	3		hsa05208	Chemical carcinogenesis - reactive oxygen species	223/8142	7.62817e-06	7.62817e-06	8.1681e-06	NRAS/PIK3CA/KRAS/EGFR/HRAS/SRC/BRAF	7
hsa04371	Apelin signaling pathway	139/8142	0.00231682	0.00231682	0.00152939	KRAS/SMAD4/NRAS	3		hsa04934	Cushing syndrome	155/8142	1.1511e-05	1.1511e-05	1.21168e-05	RB1/EGFR/CDKN2A/CTNNB1/APC/BRAF	6
hsa04072	Phospholipase D signaling pathway	148/8142	0.00277023	0.00277023	0.00179822	KRAS/EGFR/NRAS	3		hsa04150	mTOR signaling pathway	156/8142	1.19435e-05	1.19435e-05	1.23625e-05	NRAS/PIK3CA/KRAS/HRAS/MTOR/BRAF	6
hsa04921	Oxytocin signaling pathway	154/8142	0.00310105	0.00310105	0.00197996	KRAS/EGFR/NRAS	3		hsa04912	GnRH signaling pathway	93/8142	1.39321e-05	1.39321e-05	1.41845e-05	NRAS/KRAS/EGFR/HRAS/SRC	5
hsa04390	Hippo signaling pathway	157/8142	0.00327524	0.00327524	0.00205745	SMAD4/CTNNB1/APC	3		hsa04630	JAK-STAT signaling pathway	162/8142	1.48237e-05	1.48237e-05	1.48489e-05	PDGFRA/PIK3CA/EGFR/HRAS/JAK2/MTOR	6
hsa04151	PI3K-Akt signaling pathway	354/8142	0.00421775	0.00421775	0.00260746	TP53/KRAS/EGFR/NRAS	4		hsa04933	AGE-RAGE signaling pathway in diabetic complications	100/8142	1.9851e-05	1.9851e-05	1.95691e-05	NRAS/PIK3CA/KRAS/HRAS/JAK2	5
hsa00240	Pyrimidine metabolism	58/8142	0.00561324	0.00561324	0.00337971	DPYD/CDA	2		hsa04916	Melanogenesis	101/8142	2.08356e-05	2.08356e-05	2.02187e-05	NRAS/KRAS/HRAS/CTNNB1/KIT	5
hsa05010	Alzheimer disease	384/8142	0.00564045	0.00564045	0.00337971	KRAS/CTNNB1/APC/NRAS	4		hsa04625	C-type lectin receptor signaling pathway	104/8142	2.40193e-05	2.40193e-05	2.29496e-05	NRAS/PIK3CA/KRAS/HRAS/SRC	5
hsa04370	VEGF signaling pathway	59/8142	0.00580356	0.00580356	0.00342475	KRAS/NRAS	2		hsa05010	Alzheimer disease	384/8142	3.07657e-05	3.07657e-05	2.89502e-05	NRAS/PIK3CA/KRAS/HRAS/CTNNB1/APC/MTOR/BRAF	8
hsa04730	Long-term depression	60/8142	0.00599682	0.00599682	0.00348597	KRAS/NRAS	2		hsa04725	Cholinergic synapse	113/8142	3.58885e-05	3.58885e-05	3.32667e-05	NRAS/PIK3CA/KRAS/HRAS/JAK2	5
hsa04929	GnRH secretion	64/8142	0.0067991	0.0067991	0.00389422	KRAS/NRAS	2		hsa04726	Serotonergic synapse	115/8142	3.90556e-05	3.90556e-05	3.56699e-05	CYP2D6/NRAS/KRAS/HRAS/BRAF	5
hsa04720	Long-term potentiation	67/8142	0.00743122	0.00743122	0.00413466	KRAS/NRAS	2		hsa04071	Sphingolipid signaling pathway	119/8142	4.60382e-05	4.60382e-05	4.14379e-05	NRAS/TP53/PIK3CA/KRAS/HRAS	5
hsa05221	Acute myeloid leukemia	67/8142	0.00743122	0.00743122	0.00413466	KRAS/NRAS	2		hsa04730	Long-term depression	60/8142	4.78052e-05	4.78052e-05	4.24136e-05	NRAS/KRAS/HRAS/BRAF	4
hsa04664	Fc epsilon RI signaling pathway	68/8142	0.00764766	0.00764766	0.00419516	KRAS/NRAS	2		hsa04929	GnRH secretion	64/8142	6.17031e-05	6.17031e-05	5.39731e-05	NRAS/PIK3CA/KRAS/HRAS	4
hsa04917	Prolactin signaling pathway	70/8142	0.00808908	0.00808908	0.00437567	KRAS/NRAS	2		hsa05170	Human immunodeficiency virus 1 infection	212/8142	6.77105e-05	6.77105e-05	5.84053e-05	NRAS/PIK3CA/KRAS/HRAS/ATM/MTOR	6
hsa04014	Ras signaling pathway	232/8142	0.00971778	0.00971778	0.00518468	KRAS/EGFR/NRAS	3		hsa04650	Natural killer cell mediated cytotoxicity	131/8142	7.29163e-05	7.29163e-05	6.20292e-05	NRAS/PIK3CA/KRAS/HRAS/BRAF	5
hsa04662	B cell receptor signaling pathway	82/8142	0.0109722	0.0109722	0.00577487	KRAS/NRAS	2		hsa04720	Long-term potentiation	67/8142	7.39093e-05	7.39093e-05	6.20292e-05	NRAS/KRAS/HRAS/BRAF	4
hsa05022	Pathways of neurodegeneration - multiple diseases	476/8142	0.0119562	0.0119562	0.00620882	KRAS/CTNNB1/APC/NRAS	4		hsa04664	Fc epsilon RI signaling pathway	68/8142	7.83434e-05	7.83434e-05	6.48738e-05	NRAS/PIK3CA/KRAS/HRAS	4
hsa05222	Small cell lung cancer	92/8142	0.0136731	0.0136731	0.00700698	TP53/RB1	2		hsa04520	Adherens junction	71/8142	9.28107e-05	9.28107e-05	7.58425e-05	EGFR/CTNNB1/SRC/ERBB2	4
hsa04625	C-type lectin receptor signaling pathway	104/8142	0.0172568	0.0172568	0.00861676	KRAS/NRAS	2		hsa04140	Autophagy - animal	141/8142	0.000103438	0.000103438	8.34291e-05	NRAS/PIK3CA/KRAS/HRAS/MTOR	5
hsa04660	T cell receptor signaling pathway	104/8142	0.0172568	0.0172568	0.00861676	KRAS/NRAS	2		hsa04020	Calcium signaling pathway	240/8142	0.000134582	0.000134582	0.000107157	PDGFRA/ERBB4/EGFR/FGFR3/NTRK1/ERBB2	6
hsa04066	HIF-1 signaling pathway	109/8142	0.0188566	0.0188566	0.00929639	EGFR/VHL	2		hsa04921	Oxytocin signaling pathway	154/8142	0.000156842	0.000156842	0.000122342	NRAS/KRAS/EGFR/HRAS/SRC	5
hsa04725	Cholinergic synapse	113/8142	0.0201803	0.0201803	0.00982464	KRAS/NRAS	2		hsa05131	Shigellosis	247/8142	0.000157593	0.000157593	0.000122342	TP53/PIK3CA/EGFR/ATM/MTOR/SRC	6
hsa04935	Growth hormone synthesis, secretion and action	119/8142	0.0222377	0.0222377	0.0106926	KRAS/NRAS	2		hsa04662	B cell receptor signaling pathway	82/8142	0.000162785	0.000162785	0.000124812	NRAS/PIK3CA/KRAS/HRAS	4
hsa04650	Natural killer cell mediated cytotoxicity	131/8142	0.0266035	0.0266035	0.0126358	KRAS/NRAS	2		hsa04360	Axon guidance	182/8142	0.000341821	0.000341821	0.000258889	NRAS/PIK3CA/KRAS/HRAS/SRC	5
hsa04910	Insulin signaling pathway	137/8142	0.0289079	0.0289079	0.0135649	KRAS/NRAS	2		hsa04660	T cell receptor signaling pathway	104/8142	0.000406277	0.000406277	0.000303999	NRAS/PIK3CA/KRAS/HRAS	4
hsa05418	Fluid shear stress and atherosclerosis	139/8142	0.0296935	0.0296935	0.0137677	TP53/CTNNB1	2		hsa04066	HIF-1 signaling pathway	109/8142	0.000485781	0.000485781	0.000359161	PIK3CA/EGFR/MTOR/ERBB2	4
hsa04140	Autophagy - animal	141/8142	0.0304878	0.0304878	0.0139696	KRAS/NRAS	2		hsa04110	Cell cycle	126/8142	0.000839596	0.000839596	0.000613451	TP53/RB1/CDKN2A/ATM	4
hsa04150	mTOR signaling pathway	156/8142	0.0367133	0.0367133	0.0166266	KRAS/NRAS	2		hsa05022	Pathways of neurodegeneration - multiple diseases	476/8142	0.00090179	0.00090179	0.000651232	NRAS/KRAS/HRAS/CTNNB1/APC/MTOR/BRAF	7
hsa00770	Pantothenate and CoA biosynthesis	21/8142	0.0405154	0.0405154	0.0181375	DPYD	1		hsa04371	Apelin signaling pathway	139/8142	0.00121139	0.00121139	0.000854926	NRAS/KRAS/HRAS/MTOR	4
hsa04360	Axon guidance	182/8142	0.0485611	0.0485611	0.0214923	KRAS/NRAS	2		hsa05418	Fluid shear stress and atherosclerosis	139/8142	0.00121139	0.00121139	0.000854926	TP53/PIK3CA/CTNNB1/SRC	4
									hsa05217	Basal cell carcinoma	63/8142	0.00126002	0.00126002	0.000879257	TP53/CTNNB1/APC	3
									hsa04144	Endocytosis	251/8142	0.00146998	0.00146998	0.00101437	PDGFRA/EGFR/HRAS/FGFR3/SRC	5
									hsa04115	p53 signaling pathway	73/8142	0.00192864	0.00192864	0.00131625	TP53/CDKN2A/ATM	3
									hsa05100	Bacterial invasion of epithelial cells	77/8142	0.00224757	0.00224757	0.00151724	PIK3CA/CTNNB1/SRC	3
									hsa05034	Alcoholism	187/8142	0.00358308	0.00358308	0.00239277	NRAS/KRAS/HRAS/BRAF	4
									hsa05222	Small cell lung cancer	92/8142	0.00372795	0.00372795	0.00246303	TP53/PIK3CA/RB1	3
									hsa04750	Inflammatory mediator regulation of TRP channels	98/8142	0.0044534	0.0044534	0.00291136	PIK3CA/SRC/NTRK1	3
									hsa04914	Progesterone-mediated oocyte maturation	102/8142	0.00498152	0.00498152	0.00322269	PIK3CA/KRAS/BRAF	3
									hsa04960	Aldosterone-regulated sodium reabsorption	37/8142	0.00705152	0.00705152	0.00451481	PIK3CA/KRAS	2
									hsa04714	Thermogenesis	232/8142	0.00768174	0.00768174	0.00486813	NRAS/KRAS/HRAS/MTOR	4
									hsa04930	Type II diabetes mellitus	46/8142	0.0107516	0.0107516	0.00674479	PIK3CA/MTOR	2
									hsa04310	Wnt signaling pathway	167/8142	0.0190632	0.0190632	0.0118392	TP53/CTNNB1/APC	3
									hsa04920	Adipocytokine signaling pathway	69/8142	0.0232157	0.0232157	0.0142754	JAK2/MTOR	2
									hsa05120	Epithelial cell signaling in Helicobacter pylori infection	70/8142	0.0238482	0.0238482	0.0145206	EGFR/SRC	2
									hsa05168	Herpes simplex virus 1 infection	495/8142	0.025012	0.025012	0.0150813	TP53/PIK3CA/JAK2/MTOR/SRC	5
									hsa04613	Neutrophil extracellular trap formation	190/8142	0.0266991	0.0266991	0.0159438	PIK3CA/MTOR/SRC	3
									hsa05202	Transcriptional misregulation in cancer	193/8142	0.0278003	0.0278003	0.0164433	TP53/ATM/NTRK1	3
									hsa00983	Drug metabolism - other enzymes	80/8142	0.0305556	0.0305556	0.0179025	TPMT/DPYD	2
									hsa05169	Epstein-Barr virus infection	202/8142	0.0312494	0.0312494	0.0181379	TP53/PIK3CA/RB1	3
